# Supplementary material for: Carbonized polymer dots derived from metformin and l-arginine for tumor cell membrane- and mitochondria-dual targeting therapy
Source: Royal Society of Chemistry journal article supplement (doi:10.1039/d3nr04145j), 2023-01-01
Supplement: d3nr04145j1.pdf [file d3nr04145j1.pdf]

## Supporting information

### **Carbonized polymer dots derived from metformin and L-arginine for tumor cell membrane- and mitochondria- dual targeting therapy**

Manling Chen,<sup>a</sup> Yang Li,<sup>b</sup> Yangcheng Liu,<sup>c</sup> Baohua Jia,<sup>d</sup> Xue Liu,<sup>\*a</sup> and Tianyi Ma<sup>\*d</sup>

<sup>a</sup> *Institute of Clean Energy Chemistry, Key Laboratory for Green Synthesis and Preparative Chemistry of Advanced Materials, College of Chemistry, Liaoning University, Shenyang 110036, Liaoning, P. R. China. E-mail: liuxue@lnu.edu.cn*

<sup>b</sup> *Department of Cell Biology, Key Laboratory of Cell Biology of Ministry of Public Health, Key Laboratory of Medical Cell Biology of Ministry of Education, China Medical University, Shenyang 110122, Liaoning, P. R. China*

<sup>c</sup> *School of Pharmaceutical Science, Liaoning University, Shenyang 110036, Liaoning, P. R. China*

<sup>d</sup> *School of Science, STEM College, RMIT University, Melbourne, VIC 3000, Australia. E-mail: tianyi.ma@rmit.edu.au*

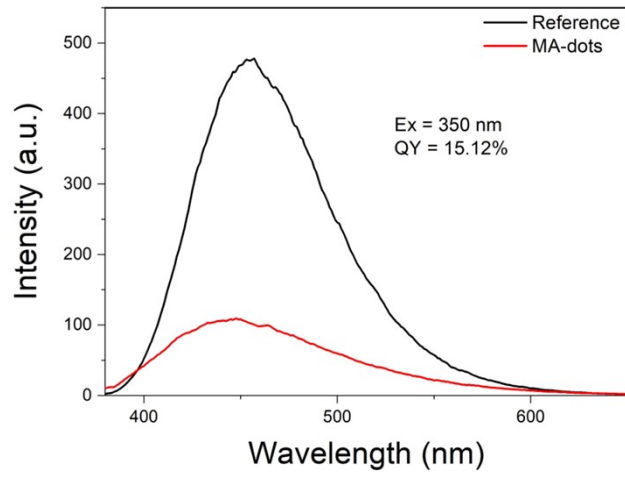

**Fig. S1** The quantum yield (QY) of the MA-dots.

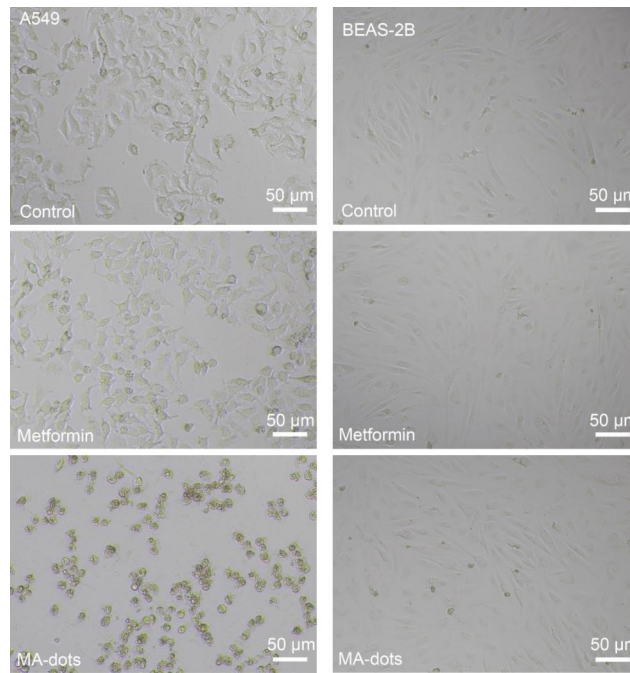

**Fig. S2** Images of the A549 and BEAS-2B cells. The cells were treated with the MA-dots or metformin ( $100 \mu\text{g mL}^{-1}$ ) for 24 h. Scale bars = 50  $\mu\text{m}$ .

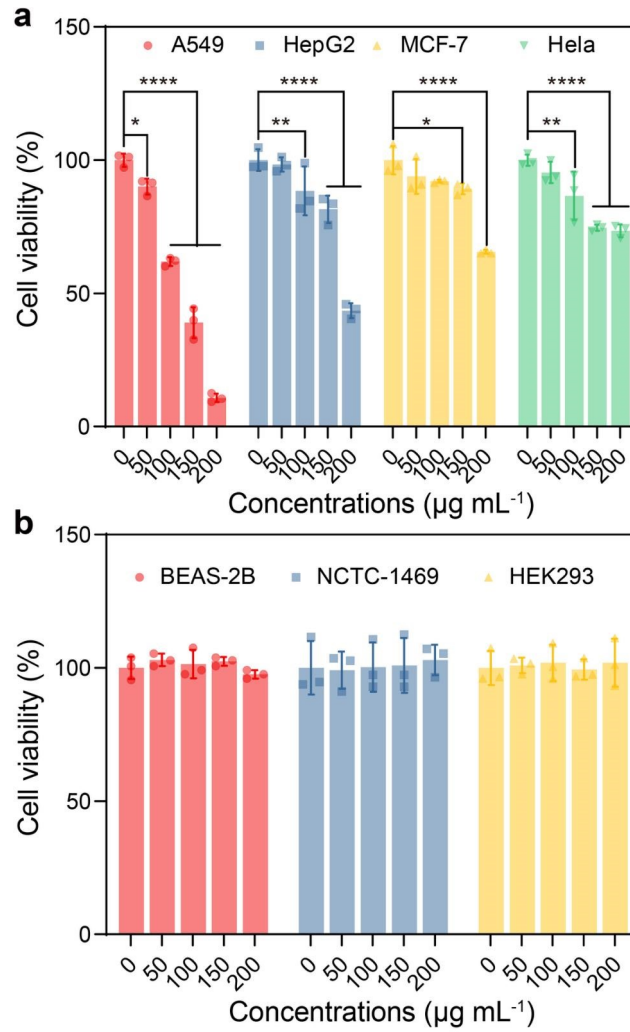

**Fig. S3** Cytotoxicity analysis of the MA-dots by MTT method. The viability of the A549 cells, HepG2 cells, MCF-7 cells, Hela cells (tumor cell lines) (a), BEAS-2B cells, NCTC1469 cells, and HEK293 cells (normal cell lines) (b) treated with various concentrations of the MA-dots (0, 50, 100, 150, and 200  $\mu\text{g mL}^{-1}$ ) for 24 h.  $n = 3$ . Data display mean  $\pm$  s.d. (one-way ANOVA,  $*p < 0.05$ ,  $**p < 0.01$ , and  $****p < 0.0001$ ).

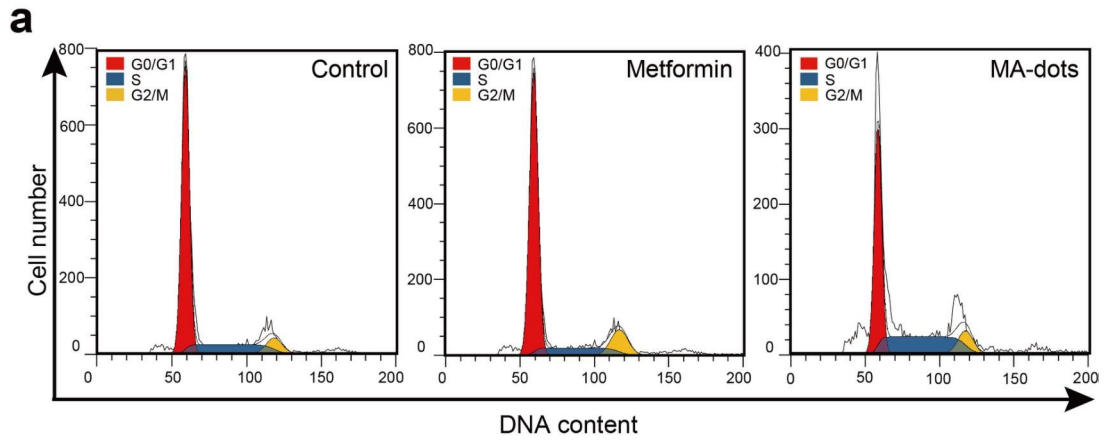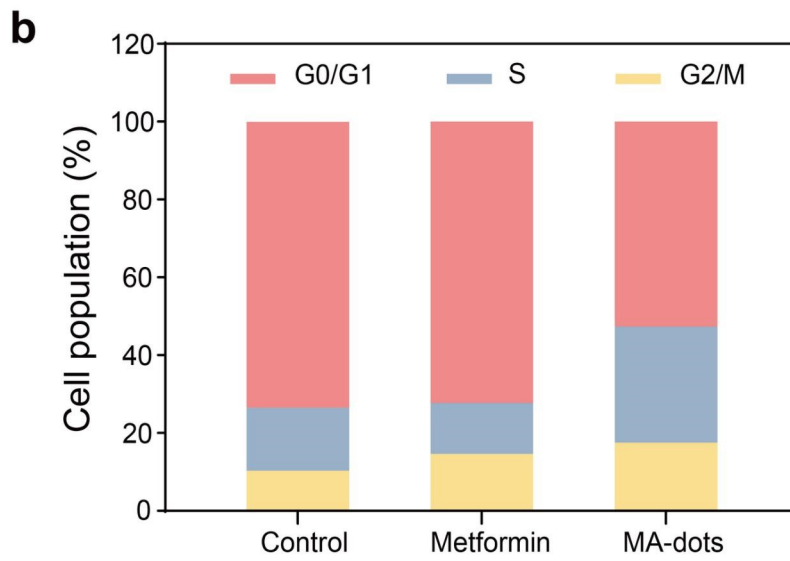

**Fig. S4** Cell-cycle analysis of the A549 cells stained with propidium iodide. (a) A549 cells were treated with the MA-dots or metformin ( $100 \mu\text{g mL}^{-1}$ ) for 24 h. (b) Summary of the cell percentage in each cell cycle phase.  $n = 3$ .

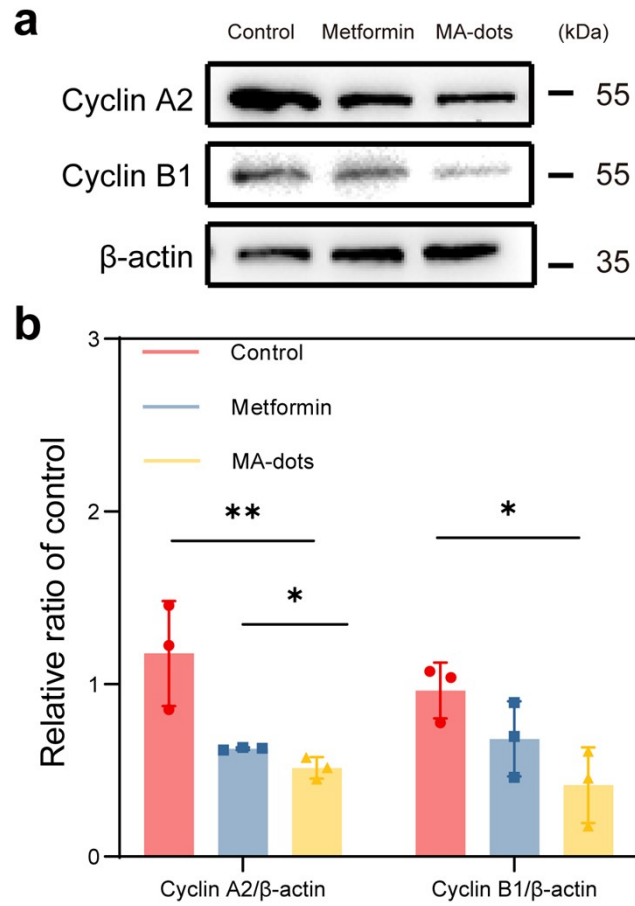

**Fig. S5** Western blot analysis of cell cycle arrest-associated proteins in A549 cells. (a) The A549 cells were treated with the MA-dots or metformin ( $100 \mu\text{g mL}^{-1}$ ) for 24 h. (b) Images were analyzed by Image J software.  $n = 3$ . Data display mean  $\pm$  s.d. (one-way ANOVA,  $*p < 0.05$  and  $**p < 0.01$ ).

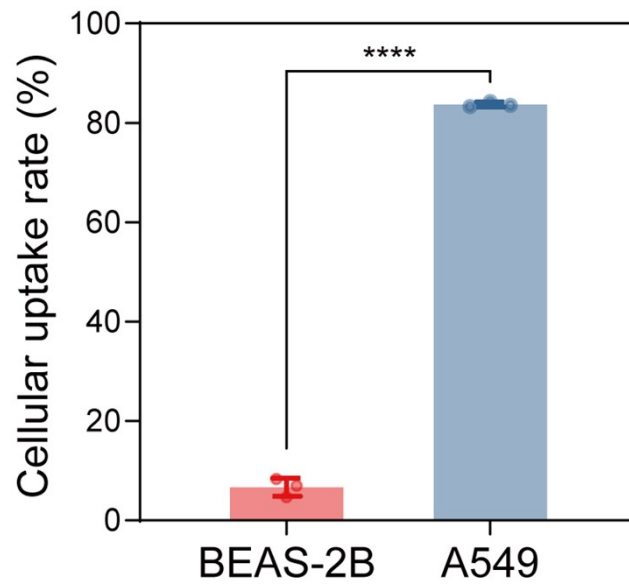

**Fig. S6** Uptake rates of the MA-dots in the BEAS-2B and A549 cells analyzed by flow cytometry.  $n = 3$ . Data display mean  $\pm$  s.d. (Unpaired Student's t-test, \*\*\*\* $p < 0.0001$ ).

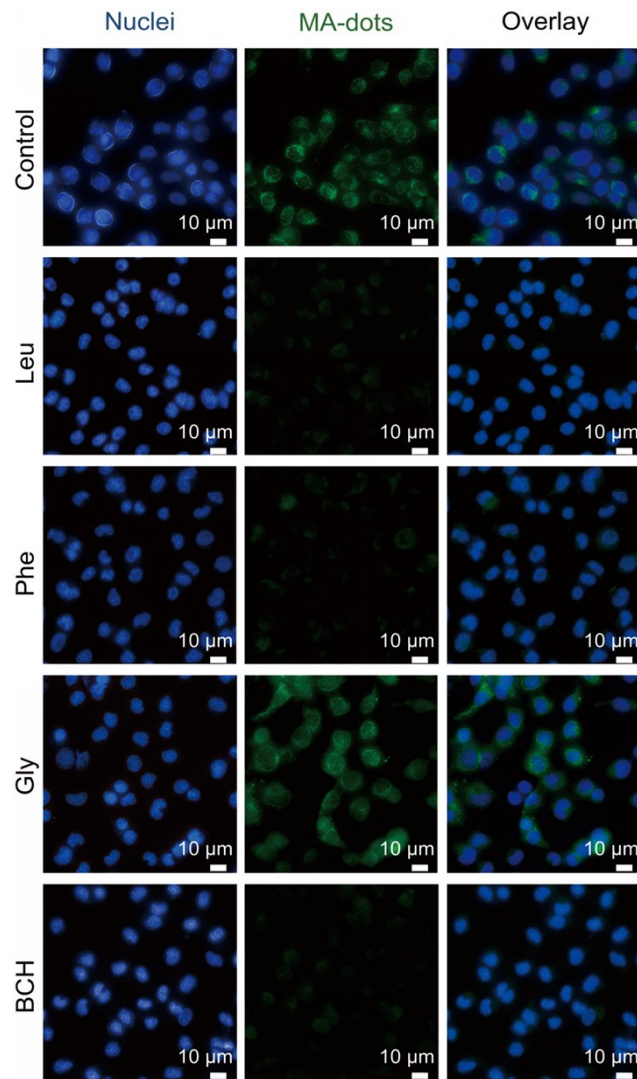

**Fig. S7** Fluorescence images of the A549 cells pretreated with Leu, Phe, Gly, or BCH before incubating with the MA-dots. Blue fluorescence ( $\lambda_{\text{ex}} = 365 \text{ nm}$ ): nuclei, green fluorescence ( $\lambda_{\text{ex}} = 488 \text{ nm}$ ): the MA-dots. Scale bars = 10  $\mu\text{m}$ .



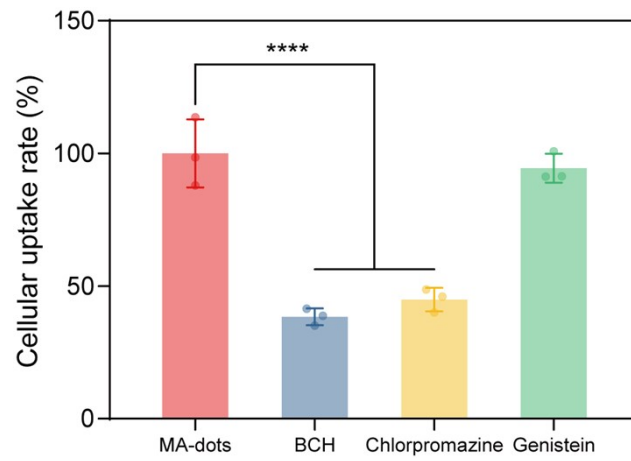

**Fig. S8** Uptake rates of the MA-dots in the A549 cells treated with BCH, chlorpromazine, or genistein analyzed by flow cytometry.  $n = 3$ . Data display mean  $\pm$  s.d. (one-way ANOVA, \*\*\*\* $p < 0.0001$ ).

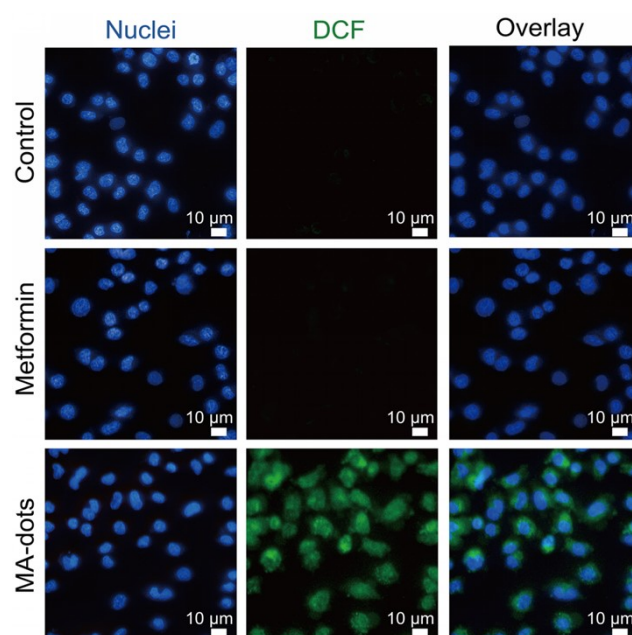

**Fig. S9** Fluorescence images of the ROS in the A549 cells stained by DCFH-DA as a ROS-responsive marker. The cells were treated with the MA-dots or metformin ( $100 \mu\text{g mL}^{-1}$ ) for 24 h. Blue fluorescence ( $\lambda_{\text{ex}} = 365 \text{ nm}$ ): nuclei, green fluorescence ( $\lambda_{\text{ex}} = 488 \text{ nm}$ ): DCF. Scale bars =  $10 \mu\text{m}$ .

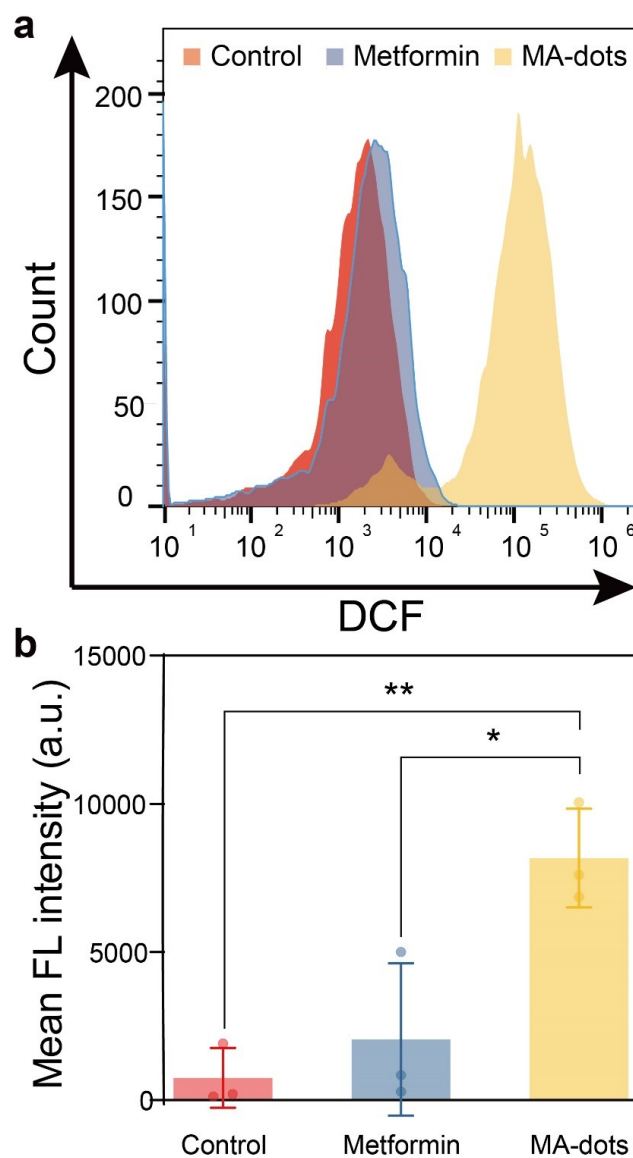

**Fig. S10** (a) Flow cytometry analysis of the ROS levels in the A549 cells stained by DCFH-DA as a ROS-responsive marker. (b) Mean fluorescence (FL) intensity of the ROS levels in the A549 cells stained by DCFH-DA as a ROS-responsive marker. The cells were treated with the MA-dots or metformin ( $100 \mu\text{g mL}^{-1}$ ) for 24 h.  $n = 3$ . Data display mean  $\pm$  s.d. (one-way ANOVA,  $*p < 0.05$  and  $**p < 0.01$ ).

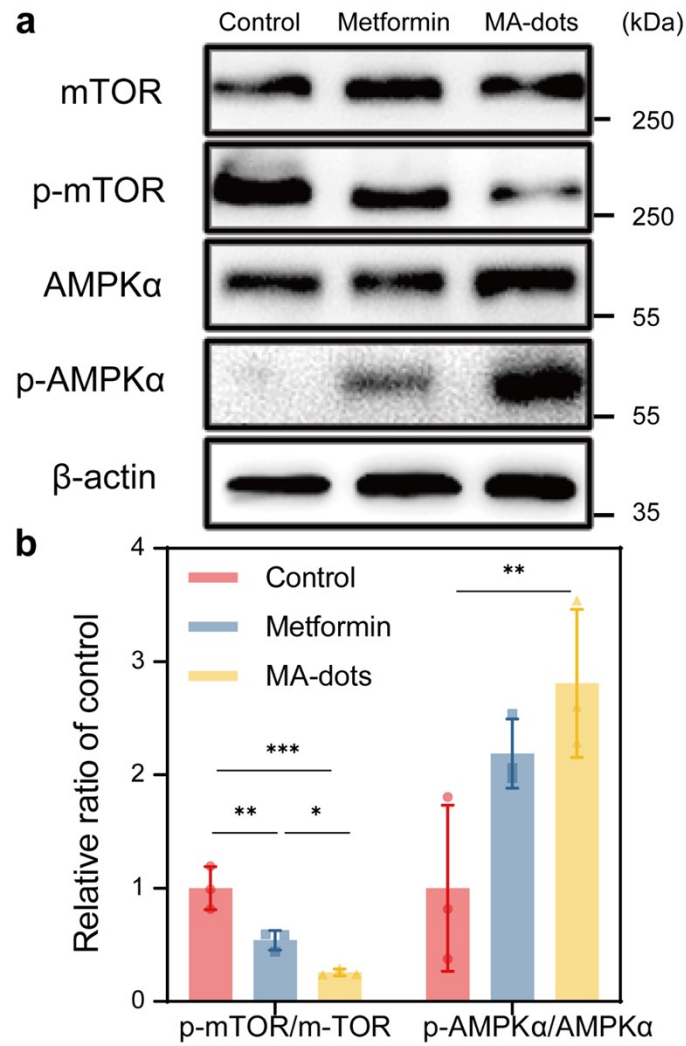

**Fig. S11** Western blot analysis of the AMPK, p-AMPK, mTOR, and p-mTOR expression in the A549 cells. (a) The cells were treated with the MA-dots or metformin ( $100 \mu\text{g mL}^{-1}$ ) for 24 h. (b) Images were analyzed by Image J software.  $n = 3$ . Data display mean  $\pm$  s.d. (one-way ANOVA,  $*p < 0.05$ ,  $**p < 0.01$  and  $***p < 0.001$ ).

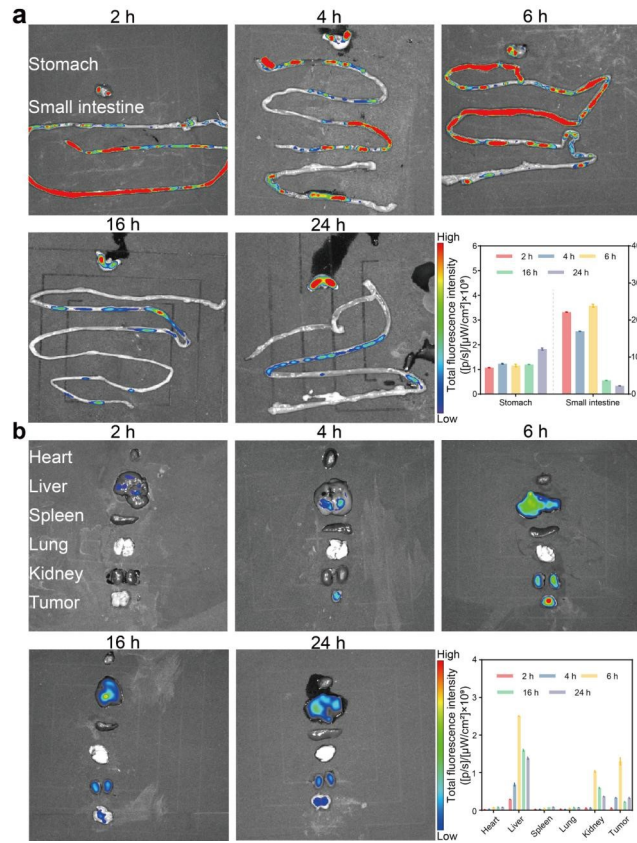

**Fig. S12** *In vivo* distribution of the MA-dots in the major organs (stomach, small intestine, heart, liver, spleen, lungs, and kidneys) and tumors. *Ex vivo* fluorescence imaging and quantitative evaluation of fluorescent intensities of the major organs and tumors in the tumor-bearing mice after oral administration of the MA-dots. Fluorescence images were captured at excitation/emission wavelengths of 480/520 nm by an animal optical imaging system. The fluorescence was from the MA-dots.

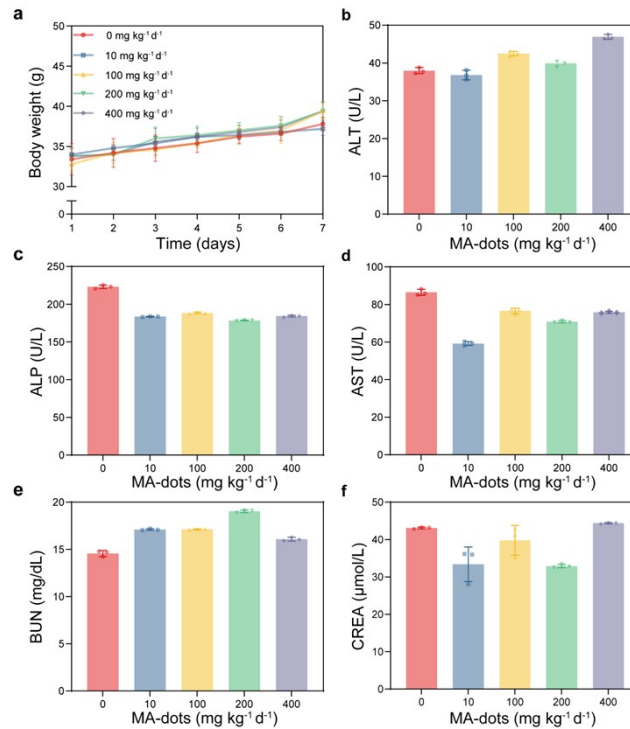

**Fig. S13** *In vivo* toxicity studies of the MA-dots in mice models. (a) Body weight change curves of the mice treated with various concentrations of the MA-dots (0, 10, 100, 200, and 400 mg kg<sup>-1</sup> d<sup>-1</sup>).  $n = 5$ . Hepatic function analysis through the serum levels of alanine aminotransferase (ALT) (b), alkaline phosphatase (ALP) (c), aspartate aminotransferase (AST) (d), blood urea nitrogen (BUN) (e), and creatinine (CREA) (f) in the mice on Day 8 treated with various concentrations of the MA-dots.  $n = 3$ .

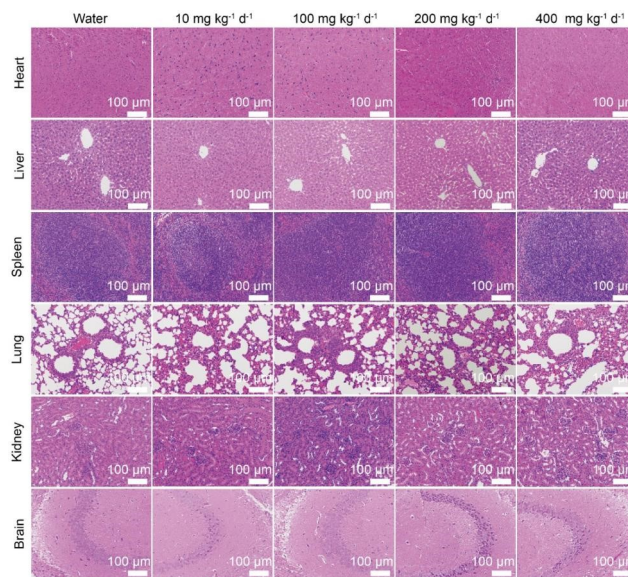

**Fig. S14** *In vivo* biocompatibility studies of the MA-dots in mice models by histological analysis. H&E staining images of the heart, liver, spleen, lung, and kidney from the mice on Day 8 treated with various concentrations of the MA-dots (0, 10, 100, 200, and 400 mg kg<sup>-1</sup> d<sup>-1</sup>). Scale bars = 100 μm.

**Table S1** Elemental compositions of metformin, L-arginine, and the MA-dots.

|                             | C 1s (%) | N 1s (%) | O 1s (%) |
|-----------------------------|----------|----------|----------|
| Metformin                   | 37.06    | 54.99    | 0        |
| L-arginine                  | 41.33    | 32.15    | 18.37    |
| MA-dots (theoretical value) | 39.20    | 43.57    | 9.19     |
| MA-dots (actual value)      | 61.01    | 29.24    | 9.75     |



**Table S2** Nitrogen compositions of metformin, L-arginine, and the MA-dots.

|                             | Percentage (%) |                 |                |
|-----------------------------|----------------|-----------------|----------------|
|                             | Primary amine  | Secondary amine | Tertiary amine |
| Metformin                   | 20             | 60              | 20             |
| L-arginine                  | 50             | 50              | 0              |
| MA-dots (theoretical value) | 35             | 55              | 10             |
| MA-dots (actual value)      | 24.57          | 29.52           | 45.91          |

**Table S3** IC<sub>50</sub> (half maximal inhibitory concentration) values on various tumor cell lines of free metformin or metformin delivery nanosystems.

| Drug                                     | IC <sub>50</sub> (μg mL <sup>-1</sup> ) | Tumor cells                                    | Treatment time (h) | References |
|------------------------------------------|-----------------------------------------|------------------------------------------------|--------------------|------------|
| O-CMC-metformin                          | >612.79                                 | MiaPaCa-2 cells (pancreatic cancer cell lines) | 72                 | 1          |
| Free Metformin                           | 371.00                                  | C26 cells (colon26 cell lines)                 | 48                 | 2          |
| Gel + Metformin                          | 3951.70                                 | C26 cells                                      | 48                 | 2          |
| Gel+ME/FU                                | 191.91                                  | C26 cells                                      | 48                 | 2          |
| Free Metformin                           | 766.00                                  | CT26 cells                                     | 48                 | 3          |
| Met-lip                                  | 245.00                                  | CT26 cells                                     | 48                 | 3          |
| Free Metformin                           | 908.59                                  | A375 cells (melanoma cell lines)               | 24                 | 4          |
| MET FCA NPs                              | 784.87                                  | A375 cells                                     | 24                 | 4          |
| MET&DOX FCA NPs                          | 434.59                                  | A375 cells                                     | 24                 | 4          |
| Free Metformin                           | 1808.57                                 | SK-MEL-28 cells (melanoma cell lines)          | 24                 | 4          |
| MET FCA NPs                              | 837.04                                  | SK-MEL-28 cells                                | 24                 | 4          |
| MET&DOX FCA NPs                          | 625.05                                  | SK-MEL-28 cells                                | 24                 | 4          |
| Free Metformin                           | >>828.10                                | MB49 cells (mouse bladder cancer cell lines)   | 48                 | 5          |
| IR775@Met@Lip + Laser                    | >207.03                                 | MB49 cells                                     | 48                 | 5          |
| Free Metformin                           | 3218.00                                 | Hela cells (cervical cancer cell lines)        | 48                 | 6          |
| MET liposomes                            | 1729.07                                 | Hela cells                                     | 48                 | 6          |
| MET Mito-liposomes                       | 220.27                                  | Hela cells                                     | 48                 | 6          |
| Free Metformin                           | 3328.96                                 | T-47D cells (breast cancer cell lines)         | 48                 | 7          |
| Nano metformin (Met-loaded PLGA-PEG NPs) | 2701.26                                 | T-47D cells                                    | 48                 | 7          |
| Free Metformin                           | 1656.20                                 | Breast cancer stem cells                       | 48                 | 8          |
| Her-LP-MET                               | <357.74                                 | Breast cancer stem cells                       | 48                 | 8          |
| Free Metformin                           | 828.10                                  | MDA-MB-231 cells (breast cancer cell lines)    | 48                 | 9          |
| Met -MSNs                                | 165.62                                  | MDA-MB-231 cells                               | 48                 | 9          |
| Free Metformin                           | 1159.00                                 | A549 cells (lung)                              | 24                 | This paper |

---

|         |       |                    |    |            |
|---------|-------|--------------------|----|------------|
|         |       | cancer cell lines) |    |            |
| MA-dots | 93.60 | A549 cells         | 24 | This paper |

---

1. K. S. Snima, R. Jayakumar and V. K. Lakshmanan, *Pharm. Res.*, 2014, **31**, 3361-3370.
2. X. L. Wu, C. L. He, Y. D. Wu and X. S. Chen, *Biomaterials*, 2016, **75**, 148-162.
3. L. Song, Y. Hao, C. J. Wang, Y. K. Han, Y. J. Zhu, L. Z. Feng, L. Y. Miao and Z. Liu, *J. Control. Release*, 2022, **350**, 922-932.
4. M. M. Song, W. T. Xia, Z. X. Tao, B. Zhu, W. X. Zhang, C. Liu and S. Y. Chen, *Drug Deliv.*, 2021, **28**, 594-606.
5. W. Xiong, L. Qi, N. Jiang, Q. Zhao, L. X. Chen, X. Jiang, Y. Li, Z. G. Zhou and J. L. Shen, *ACS Appl. Mater. Interfaces*, 2021, **13**, 8026-8041.
6. J. Pendhari, H. Savla, D. Bethala, S. Vaidya, U. Shinde and M. Menon, *J. Drug Deliv. Sci. Tec.*, 2022, **76**, 103795.
7. N. Hassani, D. Jafari-Gharabaghlo, M. Dadashpour and N. Zarghami, *Appl. Biochem. Biotechnol.*, 2022, **194**, 4930-4945.
8. J. Y. Lee, D. H. Shin and J. S. Kim, *Pharmaceutics*, 2019, **12**, 11.
9. V. T. Banala, S. Sharma, P. Barnwal, S. Urandur, R. P. Shukla, N. Ahmad, N. Mittapelly, G. Pandey, M. Dwivedi, N. Kalleti, K. Mitra, S. K. Rath, R. Trivedi and P. R. Mishra, *Adv. Healthc. Mater.*, 2018, **7**, 1800300.
